# Supplementary material
Source: Springer Nature journal article supplement (https://www.springermedizin.de/resource/supplementary/12874_2008_330_MOESM3_ESM.pdf/9434242)

### Time constraints

- „It takes a lot of time to explain the aim of the study to patients and receive informed consent from the patient.“
- „Recruiting patients is a lot of work for the recruiting doctor.“
- „The recruitment records that have to be completed are too extensive.“

#### Combined

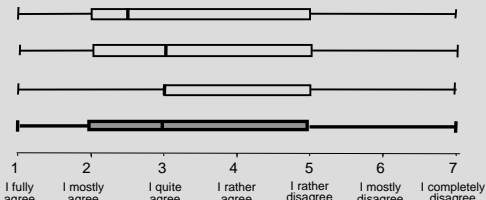

### Difficulties including eligible patients

- „Often, I cannot recruit patients because they do not want to participate in the late rehabilitation group.“
- „Often, I cannot recruit patients because they feel that participating in the trial is too complex.“
- „A barrier for successful recruitment is that the general practitioners are not willing to participate in the trial.“
- „I often cannot recruit patients, because they generally do not want to do sports.“
- „In my opinion, the eligibility criteria are too strict.“
- „Often, I cannot recruit patients because they do not want to participate in the early rehabilitation group.“
- „Competing other trials impede the recruitment of more patients.“

#### Combined

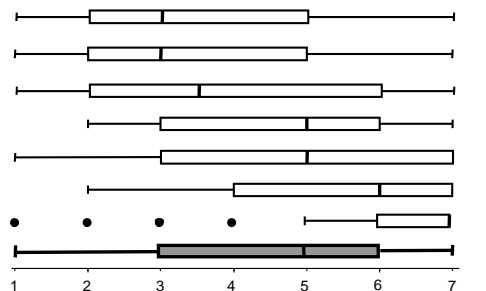

### Limited human resources

- „It is difficult for me to recruit a patient because I cannot delegate the work to someone else when I do not have time to do it myself.“
- „A reason why recruiting patients is not going well is the absence of supporting local trial personnel.“
- „In our hospital/private practice eligible patients are often missed.“
- „For me it is difficult to recruit a patient because I do not receive support from the team and from seniors.“
- „I think recruitment would be easier if there was more support and supervision from the trial coordinators.“
- „It is difficult for me to recruit a patient because responsibilities for the different tasks are not clearly defined in our setting.“
- „I think recruitment would be easier if a newsletter was sent out more frequently.“

#### Combined

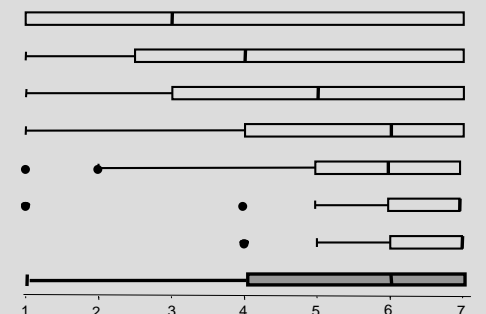

### Trial design barriers

- „In my opinion, the trial arm „late rehabilitation“ does not correspond to actual best practice.“
- „The trial is very complex, it takes a lot of time to understand the trial question and the procedures.“
- „I find the trial design and the trial protocol unclear and difficult to implement.“
- „I think the trial question is only of interest for the rehabilitation clinics and ambulatory rehabilitation programs.“
- „The trial question is not of any relevance for my work.“
- „In my opinion there is no clinical rationale for this trial question.“
- „In my opinion, the trial arm „early rehabilitation“ does not correspond to actual best practice.“

#### Combined

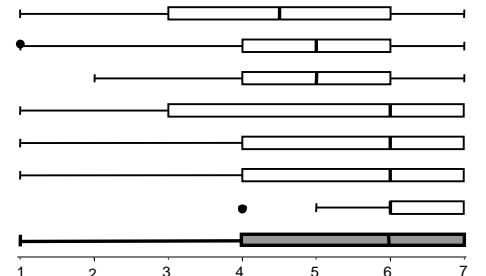

### Insufficient training of recruiting physicians

- „In my opinion, the study briefing and instruction of the recruiting doctors by the trial coordinators was not sufficient.“
- „In my case, the randomization procedure is a hindering factor, because I do not quite understand, how it has to be done.“

#### Combined

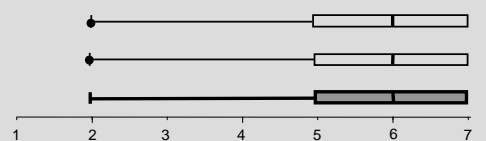

### Individual barriers of recruiting physicians

- „I find it difficult to explain to the patient the rationale and the benefit of the trial.“
- „I think that in regards to time, costs and transportation too much is expected from the patients.“
- „In my opinion the randomization to early and late rehabilitation is ethically not justifiable.“
- „I would recruit more patients if higher incentives were offered by the study coordinators.“
  - financial incentives
  - co-authorships
  - other incentives
- „I am only participating in the trial because my colleagues do so, but I am not committed to the trial.“
- „I have concerns that the recruitment of a patient could have a negative influence on the doctor-patient-relationship.“
- „I have concerns that the recruitment of a patient could have a negative influence on my relationship to colleagues.“

#### Combined

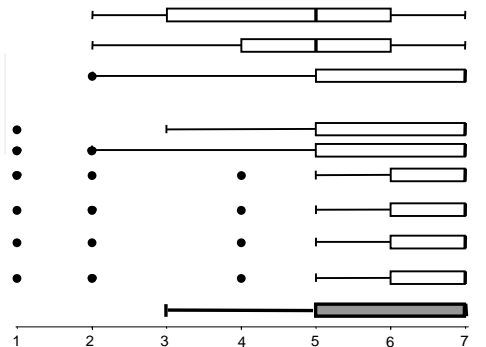

### Lack of access to treatment

- „One reason why recruiting patients is difficult for me is that there is no rehabilitation programme close-by.“
- „One reason why recruiting patients is difficult for me is that it is impossible to refer a patient immediately to rehabilitation.“

#### Combined

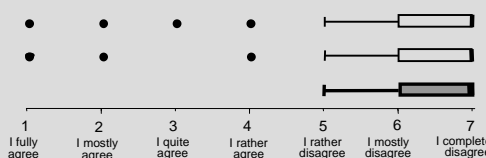

Supplement: MOESM3 [file 9434242]
